# Supplementary material for: Genome-wide Analysis of R2R3-MYB Transcription Factors in Boehmeria nivea (L.) Gaudich Revealed Potential Cadmium Tolerance and Anthocyanin Biosynthesis Genes
Source: Research Square preprint supplement (doi:10.21203/rs.3.rs-871051/v2), 2022-02-24
Supplement: Supplementary file 2 [file 62ce83de7196d657defad0aa.xlsx]

## Sheet: a
Table S3: Consensus sequences of the group specific motifs.
Motif	Width	Consensus sequences
1	30	LHALLGN[RK]W[SA]LIA[AG]RLPGRTDNE[IV]KN[YH]WN[TS]
2	33	RCGKSCRLRW[TL]NYLRP[DN][IL]KRGNF[ST][EP]EE[ED][ED]LI[IL]R
3	23	K[KR]GPW[TS][PA]EEDX[KI]LIXY[IV]XK[HY]G[EP]G
4	11	[NC]WR[SA][LV]PKKAGL
5	11	MGR[AS]PCCDKVG
6	21	H[LI][KR]K[KR]L[LI][KQ]MGIDPVTH[KR]P[LR]S[DE]
7	50	D[LY][IL]K[PN][KA][LI]V[SM][FK][ET][QP][DN][LT][IL][CA][QM]P[QM][AP]I[DP][QS][AP][ET]K[AKN][LE][CP]I[DQ][SD][QN][PF]L[VI][PS][FHS][PN][PM][TS][TK][IN]QP[QS]LDL[GL]
8	50	FGIPF[IT]EPVESCRSGG[KQ][PT]EFD[DN][LS]PTPDCFFDDFPVDMFDQI[ED]P[LI]PSPSDL
9	11	NW[SN]LI[AS][EK][KS][LI]PG
10	48	RQKRLARILQTSSTP[HY]SKPHKSKTQ[LV]SASHEL[HP]ILE[GI][RL][GS][FC]SS[SL]S[EN][GE][EN][IS]
11	29	ESHELLAR[LP]DPYYDM[FL]GP[FL]DDPKL[EK]NG[PAV]E
12	21	[FS][SAG][AC][EC][FLS][LD][AD]V[MEV][QN]EM[IT][RAP][KN][EV]V[RV][DNS][YH][MV]
13	20	R[MV]KRR[QK]R[AQ]GLP[ILV]YP[HN][DE][IQM][LCHQ][QHM][QH]
14	14	HLKK[KR]LXKXXXXXX
15	21	[TV][RE]HMA[QD][WQ][EN][SE][AV][RK][LF][EP]AE[AI][RQ]L[ST][RH]E
16	50	GPEF[IV]DY[SL][ED][PS][TP][ST]FPS[FS]ELAAIAT[DE]I[SG][NS]LAWL[KR]SGLE[NS]SSVR[AV]M[GE]DA[AV]GR[IL]
17	34	RVQKQA[KR][HQ]L[KNR][CI][DE][VAS][EN][SG][KAN][AGLQ]F[QAK][DE][AIT][MI]R[CHNR][FV]W[MIV]PRL[ILV][EQ][KR][IV]
18	17	N[IK][DF][AS][KL][DK]QV[PC]FIDFLGVG
19	13	V[VI]RT[KR]A[FT]R[CF][TS]KA[VL]
20	50	NFVCNDVVQEMDQFYCSDSLWKMDDDEASKPITTFVNNAYDTAFSAGFGA
