# Supplementary material for: Genome-wide Analysis of R2R3-MYB Transcription Factors in Boehmeria nivea (L.) Gaudich Revealed Potential Cadmium Tolerance and Anthocyanin Biosynthesis Genes
Source: Research Square preprint supplement (doi:10.21203/rs.3.rs-871051/v2), 2022-02-24
Supplement: Supplementary file 5 [file 8ef2aa9309d6bf20cd502d72.xlsx]

## Sheet: a
Table S1: Basic information of the 105 BnGMYB genes identified in this study
Gene Name	Gene ID	Chromosome No.	position			Size（aa）	MW(Da)	pI	Predicted Subcellular location	Grand average of hydropathicity (GRAVY)	Protein sequence
BnGMYB78	Maker00019930	chr10	10150784	10153251	-	365	39704.8	6.39	nucleus	-0.725	MGRPPCCDKVGVKKGPWTPEEDIILVSYIQEHGPGNWRSVPTNTGLLRCSKSCRLRWTNYLRPGIKRGNFNDHEEKMIIHLQALLGNRWAAIASYLPQRTDNDIKNYWNTHLKKKLRKLQPGLDGHNTQDGLSSSANNSPQISKGQWERRLQTDIHLAKQALCEALSLDKTNHHDHDHHHLHNNNSLLVESKPSINALRTNITAATADDRPHPNQPSSSSPAYASSADNIARLLENWMKGSANVAGQGNPAGAYRGATSSSSDEGTSTPPHHHGFDHSLFSFGSSEGSHESLSADEATANPTPEAASLFRGEMISEAGGGGGGGQGQQAQAPLTLLEKWLLDDGAAAQGHEDLIHMSLEDSVSLF
BnGMYB85	Maker00052046	chr11	13365448	13367690	-	239	27559.1	9.22	nucleus	-1.048	MEDKRAKKLPKKHLWKPEEDLILKKYVETHGEGNWATVSQQSGLMRGGKSCRLRWKNYLRPNIKRGGMSQEEEDLIIRMHKLIGNRWSLIAGRLPGRTDNEVKNYWNTHLNKRCPRRRRKLADTNSNQNNSHSSEKTAKKNKTKDPNPTITKTQNTTTDKLEQREEEENSNLQNPSSMGDTKGFDYGIESPIMAENSSMFVFDAEPLPTYLDSFLFFEAFGCIAGEESYAEIGMRSVMP
BnGMYB99	Maker00055315	chr14	745418	750066	+	391	43786	9.23	nucleus	-0.671	MSILQHRKPNSEPLSGSQLSLSNHSFEVIGKSVDREPKFTSSQMGFQILSSDVFGEEKKPQVSKSSGRTKVCARGHWRPAEDTKLKELVAKHGPQNWNLIAENLHGRSGKSCRLRWFNQLDPRINRRAFSEEEEERLLASHRVYGNKWAMIARLFPGRTDNAVKNHWHVIMARKRRDESSVYKRRNNNNSNNNNNKGSACCSDDVENEMTPKVVVDHMNCLHKNSSSTESTISITNIIDDQSTVSTCARLSLSRVAADHLSSNIAPPGFSTHFAPSSQLEKQKGMSLLRLGVNYSYLLFSQDEYFLFAGLKRSYERLIGCYHVGQVWGVKTVGLDHQHGQSDSRSENSAAESDGTTNRSSILAISNPKPNDEHVKTIALPFIDFLGVGSST
BnGMYB18	Maker00050665	chr3	10582669	10584863	-	322	35311.2	8.8	nucleus	-0.748	MGRHSCCYKQKLRKGLWSPEEDEKLLNYITKHGHGCWSSVPKLAGLQRCGKSCRLRWINYLRPDLKRGPFSQQEENLIIELHAVLGNRWSQIAAQLPGRTDNEIKNLWNSCIKKKLRQKGIDPNTHKPLSELLITSATNSDITITTKDNHNHNSHLSNTDDRNDLTTLAPDPPPPQSANTCLPSAAAAYRDYSSGHEVCSSAANRPPATNDHLPPGGTTAGYFSFYGGEIGGNFGFGGGARHGGSKSVSSCVSSLTALDHHHDHNANNNNNISVKPENAQFVATWHQSNGHGQFQQGGSNNPDISMYTKDLQRLAVAFGQTL
BnGMYB2	Maker00075382	chr1	1887044	1889621	-	384	43968.4	6.19	nucleus	-0.898	MGHRCCSKQKVKRGLWSPEEDDKLIKHITTHGHGSWSSVPKLAGLQRCGKSCRLRWINYLRPDLKKGSFTEEEEQIIIDVHRILGNRWAQIAKHLPGRTDNEVKNFWNSCIKKKLMSQGLDPQTHNLISSHQTRASNGNTNYKIKNGVTSFVVSHENHEQEPISVFSMSSSSSQEITNVICSDQDLHHHQVPAFDITLPNNAISTVDHHHHHQHQQHHSSSSSTTTPSTAWTLKGQINSSHNIDNNFHQQYNYNIPSSSSSSHMDVQNPSRSCTLPDHDFGIWGPNFEPSFETPRLLEANEQLYSMEGHDHDHIDNHDHHNGQMTKQLQHNDHEKDGQIIENNERSVEKYSSFDLGFMESALMSDIVMCTNDFSSMEYDIAWNY
BnGMYB60	Maker00087487	chr8	11551750	11553228	-	329	37850.6	8.21	nucleus	-1.171	MGRAPCCAKVGLHRGPWTPREDTLLTHYIQAHGEGNWRSLPKKAGLLRCGKSCRLRWMNYLRPDIKRGNITPDEDDLIIRLHTLLGNRWSLIAGRLPGRTDNEIKNYWNTHLSKRLRSQGTDPNTHKKLSDPDPALRRGSAAQRRNNKATRKKKNNKDNNNNNKNNTNNKQIVHLPKPIRVRRNYSFEWINNGTNSTNDNNNNINNNNNNACGSSSQEKGSTTSSSNDQEVDVPWFKVATSTSEHDHEYYDYHHDDHNELGFLINSNIVDHHNNVNHDLDHHDLESRGDSIALENMYEEYLAQLLKTSDHQGYDHDQLELDSFAESLLI
BnGMYB73	Maker00059234	chr10	5060047	5060598	-	330	36952.9	5.52	nucleus	-0.565	MEPPCCDKPGMKRGLWSEEEDAKMLEYVSKHGKGKWTSVPKKAGLRRCGKSCRLRWTNYLRPDLKHESFTSKEEELIVKLHAAIGSRWSMIAQQLPGRTDNDVKNHWNTNLKKKLANMGIDPVTHKPFSQIFADYGSIGGFSKPGMRIGSLNKDYLKNAIVMKTPNTLAMPMPIPSPTKAEPIQDNFLISHNMSKNQPSLDLLAQLQGINLVKEDSSTPSFRVEKGTLSSSLSPSSSSSTCSSAAQDLSPNIVPFNWNEFLLEDEFLPSEAQDCQEKESQVIESEETDYETNHIVSSNIEVNETSFVEALIAKESEMLMEFPDLLGGEFY
BnGMYB70	Maker00074173	chr10	2339244	2341013	+	201	23049.2	8.66	nucleus	-0.783	MRKPCVEKRDQTNKGAWSKEEDQKLVDYIRKHGEGCWRLLPQAAGLLRCGKSCRLRWLNYLKPDVKRGNFGEDEEELIIKLHALLGNRWSLIAGRLPGRTDNEVKNYWNTHLRRKLIQMGLDPNKHKIGQVVLLNFTNSAAKRECHDFNKSDCGNCRRSDVQEQTSDCQTFDSECGVDSCLPDLNLDLTIGPPSQLGYNVH
BnGMYB35	Maker00077684	chr5	2508706	2511316	-	317	35409.4	5.01	nucleus	-0.7	MGRQPCCDKLGVKKGPWTAEEDKKLINFILTNGHCCWRAVPKLAGLRRCGKSCRLRWTNYLRPDLKRGLLTDSEEQLVIDLHARLGNRWSKIASRLPGRTDNEIKNHWNTHIKKKLLKMGIDPVTHEPLNKDDIQLLASSNNNKENCPKDANSSNNDHHLPQSADLANANKPNHSQENSTCGSTTMMINSEEINSSSSPATAENSSASGGEESFLLDSLCNDDVSLMKNLWPEDQSPDQLVDAFWNSTCDNYPLIDGEKLGNSDMGILPSNFEDNCSWLLDCEDFGIQDFGFDSFVDDFELSNALSTIENNLGQTLH
BnGMYB63	Maker00086957	chr8	13439052	13443020	-	427	47827.8	8.56	nucleus	-0.66	MGRRPCCAKVGLNKGAWSAMEDKVLSDYIKLHGEGKWRDLPEKAGLKRCGKSCRLRWLNYLRPDIRRGNISSEEEDLIVRLHKLLGNRPNVNSSAADAPPRYKPSIPAVNPRFSTSSSAAPHSPTPRTALPPMLHRTANPRFLPRAAPLPLASPRSYRLRQNTHREDFEGCDGFVRSGLRRRRRLRSDGWALIAGRLPGRTDNEIKNYWNTNLRKKVQLNDKALDDHRFSNRVVRTKAFRCTKAVKIPRLLDHHASVSGTVTLIGGQKNSEIQTDSSQDINLKGDDDCCADFLSDFDFNDLLIMSDLLNPDGAKLESSAGGLNVDGERASLKHVTSSTSELEDKVGCGDDFYYQAQSELDGLIMNSTEATMKSTNWSDSDHIYRPSCEGFHDINELSSF…
BnGMYB36	Maker00052728	chr5	5906825	5908281	+	344	38521.8	6.07	nucleus	-0.811	MGRSPCCDHENSSLKKGPWTPEEDKKLVDYISEHGHGCWRSLPKLSGLNRCGKSCRLRWTNYLRPDIKRGKFSQEEENIIINLHSALGNKWSKIANHLPGRTDNEIKNYWNTYLRKKLLQRGIDPLTHKPRTDLNPLLNLSHLLSSSHLANLIMNSNTSSSTSPPNWDNALKLQAQATDQLVKIQLLQNLFQALNSTTTNGLLIGSRNLSPNLIGYANQNPPGFVTCVDPSESRATHDHLNMWECVKGSDGGDGGFGTDSQKSKGIWTNSDDKEGNQYDQNTVNPLPDLVNSEPFPETNSTISGQMDNKSTTSVEPSSSIFEAWDKLMDNDDQASESYWKDILE
BnGMYB105	Maker00006748	Contig114_3	220397	222319	+	319	36471.4	8.74	nucleus	-0.913	MEDSGGLHEAASSAENGAKSGCPRGHWRPAEDEKLRQLVEQYGAQNWNSIAEKLQGRSGKSCRLRWFNQLDPRINRRPFSEEEEERLIAAHRVHGNKWALIARLFPGRTDNAVKNHWHVITARKQREQSKICGKRSHQDFSNYYNDSEASSGNFPAKQSHFRGDYFSLLGKNHFVNYSMTPTTKSGGTKLPTLEACFYVGRDQEDRYQRDNLFMDPSASTQNYYGSLWPNTYFDYIRGHRRPHHYGINRNICNIQRDRSLLLADDYNNSSCENVTPSINGIGKLRAIAKMQGQEDDQLSNIDAKDQVCFIDFLGVGVSS
BnGMYB93	Maker00043572	chr13	4103968	4105417	-	298	32793.7	5.5	nucleus	-0.638	MGRSPCCSKEGLNKGAWTALEDKILKSYIKAHGEGNWRSLPKRAGLKRCGKSCRLRWLNYLRPDIKRGNISGDEEELIIRLHNLLGNRWSLIAGRLPGRTDNEIKNYWNTTLGKKAKLAKQSSSSSPPMSNIQTISKSQLGNTINSDQAKVIRTKATRCSTKVIVVPSPLPNTDHITDQNSPALLVEEPHDENSPVNDEALTTASVPPGEPGGQGLCDTTFEGRIGATGDQKWPESYSGDLSIEDLGLSLPFDIHEPGFDDWFQSSTTFTTCLDQEDNATLDLDSLAFLLDSEEWPGN
BnGMYB59	Maker00079198	chr8	8212804	8214512	+	314	35453.2	5.35	nucleus	-0.623	MEGKKEECIRKGPWKAEEDEVLINHVSKYGPRDWSSIRSKGLLQRTGKSCRLRWVNKLRPNLKNGCKFSLEEERVVIELQAEFGNKWARIATYLPGRTDNDVKNFWSSRQKRLARILQTSSTPHSKPHKSKTQLSASHELPILEGRGFSSLSEGEISSKILSCSSSSNENSEIIKMVSLPDLTKPKLVSFEQDLICQPQAIDQAEKNLCIDSQPLVPSPPTMIQPQLDLGFTSESHELLARLDPYYDMFGPFDDPKLENGPELPFGIPFIEPVESCRSGGKPEFDNSPTPDCFFDDFPVDMFDQIEPLPSPSDL
BnGMYB88	Maker00058379	chr12	7928540	7930398	+	378	42094.5	6.67	nucleus	-0.716	MGRAPCCDKANVKKGPWSPEEDAKLKSYIDQNGTGGNWIALPQKIGLKRCGKSCRLRWLNYLRPNIKHGGFSEEEDNIICNLYISIGSRWSIIAAQLPGRTDNDIKNYWNTRLKKKLLGRQRKEQAMAAAQARRRRPNNFSPKQEIIMKREIANSQGSPNFDDDNTSPIIDHHHHLQSRFASSYHVMSQADHQAPNYWPPELPLAMPAAQESDQQASLKNLLAKLGGRFSEGSATACNYAFPAADHDHHLMVSSAQDQAYQASKFDVLTSSTSLYGGGESSFQLGLENLQAELSELINYSNYQQADDQLVGDYGANYSGGFTSANSTTSLDSSSSSLVNYHSNNMVSDHRYSQFHQDNSAFDQVSSCYFGSAYDNITI
BnGMYB5	Maker00076244	chr1	5879243	5881940	+	331	37341.8	6.27	nucleus	-0.675	MGCRSSDKPKPKHRKGLWSPEEDLRLKTYIQKHGHSCWSSVPLNAGLQRNGKSCRLRWINYLRPGLKRGTFSKDEEETILTLHHMLGNKWSQIATRLPGRTDNEIKNYWHSYLKKKVAKAEENMANIDQSKTDYSTSCSDITKESSSSTALEKNNNNQISSYEYSPEQIGKISPSMLLTNDNNIQSHVPQFCDMPRDQLYEAPKSSLPRLFFAEWLSLDHDQQQQIHGPCAANIDVVPGTKLVVPREGFGHGALSFQDSIGHGFLMNEDSIFGGDFQTPLSHGSISEHEMINSDFKFVDQISGSGNIVDFISGSDLCNIDFNNIHSDAMYI
BnGMYB13	Maker00044418	chr3	3203254	3205617	+	381	42793.2	6.9	nucleus	-0.803	MGRAPCCDKANVKKGPWSPEEDAKLKEYIEKYGTGGNWIALPQKVGLKRCGKSCRLRWLNYLRPNIKHGEFSDEEDRIICTLFANIGSRWSIIAAQLPGRTDNDIKNYWNTKLKKKLMGFVHNSASYNNPHRKFMINPPTLINQNPSDHHESTTIASTTTSSFSLSHLLMPSSFYKDHHSNSYDYHNYHSTSMSIPSNSTTRSFSSSLDHQMPNNNYSNPTMTTSASTFNSTHLSSSLLNFQAQDHHNMVDGFLGQNSGQHYQPHVKDNNSNNLVMFGSSTNEGSCSTSSDGSCNYHIKQEEMGFQYPQGSFLGMLSNNNNYNGNIIGDDQDHYNNLNLMWGHKASGCFGETPLADHDHQQHFSSSCVVEDAKQMISTIHG
BnGMYB46	Maker00042590	chr6	17285074	17286774	-	288	32701.8	5.22	nucleus	-0.674	MGRRPCCSKVGLNRGAWTKLEDQILTDYINVYGEGNWNNLPNLAGLKRCGKSCRLRWVNYLRPDIKRGNISKDEEDLIIRMHKLLGNRWSLIAGRLPGRTDNEIKNYWNTTLRKKLEPSNPKMVTNSSELSKAKTEGQEAKNIVEPVRTKAFRFTNRITQTLMPKTISQLSPNSDHSTSDEDQGKYSSGELVINCHDSTVEEDETLDLMIEYSATFCDDLPQMINGNMINNAREYPPSDEQGVLDDGWIMARSSNLGEYLIGGFDNDLGMADFDVLASFLDLYERECS
BnGMYB91	Maker00047127	chr13	2989767	2990621	+	284	30952.7	8.77	nucleus	-0.565	MESAKRESDRIKGPWSPEEDEALRRLVQSYGPRNWSLISKSIPGRSGKSCRLRWCNQLSPEVEHRPFTPEEDDTIVRAHARFGNKWATIARLLNGRTDNAIKNHWNSTLKRKCSSMSDDFDALDLHPPLKRSASVGAAVFATPGSPSGSDLSDSSLPGGVSLSHSFRPIPITVAGPPSQPADAASDPPTSLSLSLPSSDTSEVSNRNRVINPPPPPPTAPAAASQVGGGYEKQFFSAEFLAVMQEMIRNEVRNYMSGIEQNGLYLHTEAVRNAVIKRIGVSKIE
BnGMYB48	Maker00002294	chr7	4941698	4943694	+	243	27766.4	7.07	nucleus	-0.771	MRRPCCEKQGINKGAWSKQEDQKLIDYIHNHGEGCWRTLPKAAGLLRCGKSCRLRWINYLRPDLKRGNFSEDEEDLIIKLHALLGNRWSLIAGRLPGRTDNEIKNYWNSHLRRKLLKMGVDPNNHRLNHTHLRPNRNVEPQTLGNYPLSSTVKTEVSNALKPRNKCDIGEVSNAPTCLEEDDQASVQPDLNLDLTITISYSIHDVANNINVEMLEEKELCDNREFGEDKSEALGSSPTLQLFS
BnGMYB87	Maker00008700	chr11	17917246	17918609	+	312	35013.4	8.08	nucleus	-0.746	MGRIPCCEKDNVKRGQWTPEEDNKLSSYIAQHGTRNWRLIPKNAGLQRCGKSCRLRWTNYLRPDLKHGQFSDAEEQTIVKLHSIVGNRWSIIAAQLPGRTDNDVKNHWNTKLKKKLSGMGIDPITHKPFSHLMAEIATTLEPPQVAHLAEAALGCFKDEMLHLLTKRRIDFQLQQSNAAIGNTTTTYINSKQEEPDDTIEKIKIGLSRAIQEPDMLPSNKLWDSTAPTFANFGGNCSAFPFSVSGFQYEPSSFSNDRDGSPWNQSMCTGSTCTPGDRLGRHPDKLEEHGESGAGKDRRNEPIMFNSDSIQSM
BnGMYB89	Maker00058364	chr12	9020081	9020926	-	281	29892.6	8.82	nucleus	-0.499	MDRIKGPWSPEEDEALQRLVQKHGARNWSLISKSIPGRSGKSCRLRWCNQLSPQVEHRAFTPEEDETIVRAHARFGNKWATIARLLNGRTDNAIKNHWNSTLKRKCSAAALDDRDSHKRHAPPGSPAGSSASDVSDSSSGGGGGAPPPPVIYRPVARAGAVLPPPPQPQPQDPPTSLSLSLPGAESSDSAPAAGATVNFLPAVSSPTVAPATVVSPVGGGEAENGVFLPFSKELLAVMQEMIRSEVRSYMAGLEQQRQQGPNGFDGFMGVAMERIGISKIE
BnGMYB55	Maker00063941	chr7	17983912	17986458	+	509	55773.4	6.08	nucleus	-0.622	MANNCSSVSTSNIVSYNNNNNNKDTRENQNANLMSPQYCSSMGRVYADMGSLSLSPTNYRLLSSSSSSSSSQQDQTSLLSLSKCSELDNGTRAFWGFPLVAGNCAVPRSFDHDQHQSNNNNNTSSGTGSEVEPLMEAKGYCDSSEGLAVEINKASLDHHDDHDETDHQDLVHVNGKEITDSTGQSKLCARGHWRPAEDAKLKELVALYGPQNWNLIAEKLEGRSGKSCRLRWFNQLDPRINRRAFSEEEEERLMQAHRIYGNKWAMIARLFPGRTDNAVKNHWHVIMARKYREQSSAYRRRKLSQTIYRRMEQESSSIVVSPSSSNSFSVNACGDHTAMASSGGVGVGVGAGAGFLLADHQQHLSCFGSVSAFGFGGLSGGVGGVAFGFNCSPHMPNVV…
BnGMYB80	Maker00059685	chr10	11903634	11906690	+	390	43565.2	8.85	nucleus	-0.85	MSIDVDGKDNNIMGRTPCCIRDGVKKGAWTPQEDQMLVSYIEQHGEGNWRSLPQKAGLSRCGKSCRLRWTNYLRPDIKRGQFSPEEEQAIIRLHSLLGNKWSSIAKNLPRRTDNEIKNYWNTRLKKRAFENENAAGNSHSDDRNPAATRPKSKRNKNDHENRPKGSSTSFSEIIASNEQAISRPDSKEEKSSSEAKKAATSTLANVLNKMATTTNCHKAERHFIDAAKAVLAKSMSRDGNVGVTNSLSGYASPTSTSTSTSSFIGFDQVAISSAFKEISSKKSIFVTEPKRPLSASANLLNHMASRLALANRGHAHGFVSYDHQPSNEIDQSTSSWKELVDHQGNYANYLGDHDQDWISCFPYVDSTSNEYHWPYNNFVDVDLREAAMET
BnGMYB40	Maker00006515	chr6	1033870	1035560	-	299	33934.4	5.9	nucleus	-0.91	MDVQVVEEYGLTRAHQILPPSTDHHLHHQHHDQEDYHHDQLYDEGQLVDIKKGPWTVEEDTLLYNYVSVHGEGRWNSLARHAGLKRNGKSCRLRWLNYLRPSVRRGNITLQEQLLILELHSRWGNRWSKIAQYLPGRTDNEIKNYWRTRVQKQAKQLKCDVNSKQFQDAMRHVWIPRLIERIHSTRPGPKPEPANATAPPPQLNDAEAGNWAGANPSATPPDSNSSDTSDGPPMSSVSELTDCGDPMGWGRAEVNGSGQTVSGLDAYNGQGFGWSSGGDSLENWWSEEDLSFLQQHLLD
BnGMYB27	Maker00057272	chr4	21494567	21495628	-	353	39207.6	9.4	nucleus	-0.681	MKERQRWQPEEDALLRAYVKQYGPRDWNLVSQRMGKPLQRDPKSCLERWKNYLKPGLKKGSLTPEEQALVISLQAKYGNKWKKIAAEVPGRTAKRLGKWWEVFKEKQLKQQELRHKKPDAAGVATSPAEKAVQGPYDHILETFAEKYVQSLSSAVVSGNANANVNGVVLPMPDPDPVLSLGSVNFASPSPALPPWMSGAANTASSTTTSSSATPSPSVSLSLSPCEPEQSEAGRLGGQVAALAQLCREAEEGRQSWVSHRKEAAWRLSRLEKQLESEMARKRREKADEVEAEIRRLREEEAAFLGRVEAECRDQLRALRGDAEAKEAKLVEAIGAKHAKLASLVERIRLMNPS
BnGMYB100	Maker00019397	chr14	4310147	4312147	-	368	40396.7	6.01	nucleus	-0.714	MGRPPCCDKVGIKKGPWTPEEDIILVSYIQEHGPGNWRSVPTNTGLLRCSKSCRLRWTNYLRPGIKRGNFTPHEEGMIIHLQALLGNKWAAIASYLPQRTDNDIKNYWNTHLKKKLKKFQSALDPHNNINMPSDQSVISTAHHQFLSNRNTTTATSLSDTKRALDNTNITSHSGSSDQLPNHFALKNSSSSSNNSSSTYASSTENISRLLEGWMKSSPKTNTAGTNDESRGELAPNKSIISENGATPSGNGGGLIMKTEEQPGEGGDLASVHEDFESILSFEGLNNNVSSSTWERSSTCGEDSTPNFKGTCVAAGEDHHHEDDEIKVHHVVIKGNPPLSFLEKWLLDETSTSATAGQVEEMMELSTMF
BnGMYB95	Maker00043660	chr13	4143021	4144251	-	212	24577.9	9.39	nucleus	-0.93	MSPAKPGGQRGKREANRGAWTSEEDQKLAQVIEIHGPRKWKSLAAKAGLNRCGKSCRLRWMNYLRPNIKRGNISDQEEDLIIRLHKLLGNRWSLIAGRLPGRTDNEIKNYWNSHLSKKKKPILERQNRTSFKALESKAVHAEKAKELVNVETKEAREEETSKGVNYEINSCTKSSNFIGDHELFAYCKSDEPLNLEWMSNFFEMDESWFHFT
BnGMYB34	Maker00077797	chr5	1557229	1560782	+	356	39795.4	8.87	nucleus	-0.74	MRIGSVLESENFASFACRKAACMPPRTDDQCLHRWQKVLNPELVKGSWTAEEDDLLIELVETYGLKRWSTIAKSLPGRIGKQCRERWYNNLDPAIRKDAWTEEEEQTLAYYHQIFGNKWADIARFLPGRTDNAIKNHWNGTLKRKCDKLSQAGVQATSQEPISPNGYRANGPPVSPLMTESPKWLKIDTSEAVNKACKPCTNPPTSRFDENVGGNGKRKSAQKSPAGETSHDDGYYHVPDLNSPYCHTSPTKLAQAHHYYSNYNSPESILRKSALTFTNTPSIIRKRTPRTIGSISISNFSSSTHGNGVNSTDISSSKYGWFSSFSSAHKASIAVKSLERQLAYAFNDDTDLAPLD
BnGMYB65	Maker00010005	chr9	4550719	4552066	+	283	32478.5	8.38	nucleus	-0.769	MYWGVMGGQMGWGLIEEEGWRKGPWTAEEDRLLIEYVRVHGEGRWNSVARLAGLKRNGKSCRLRWVNYLRPDLKRGQITPHEESIILELHARWGNRWSTIARSLPGRTDNEIKNYWRTHFKKKQAKASADTSEKAKARLLKRQQFHQQQQLQQQQQQQQQQQQQEFNQMDLKRIMAMLEDSEHSAQPPPAPQARPDEPPLYAAFPHQAAAAADEQQSLLFYSMLSNNAVPALPEEASSVVNLEAIWDYGLWNLEDFHGTNNTFGSACSTAAKSAVQNLVLPFC
BnGMYB52	Gene.34335	chr7	11653574	11654096	-	135	15604.8	10.05	nucleus	-0.971	MEGKKEEDIKKGPWKAEEDEVLINHVSKYGPRDWSSIRSKGLLQRTGKSCRLRWVNKLRPNLKNGCKFSLEEGRVVIELQAEFGNKWARVATYLAGRTDNDVNNFWSSRQKRLARILQTSSTPYSKPHKSKTISN
BnGMYB3	Maker00075016	chr1	3146169	3146942	+	257	28072.3	7.76	nucleus	-0.668	MPRNHYGMDASAKMAMISGRGKDDEEEGETAKQEEQRIKGSWSPHEDAALVRLVELHGPRNWSAISAGIPGRSGKSCRLRWCNQLCPDVQHRPFTPEEDAVIVKAHAQHGNKWATIARLLPGRTDNGIKNHWNSTLRRRRSNAASASSSAESGSVEHSPMPPPQDKRRRLASSPERGDRVETSLTLSLPGESVAASAAAVAAGDGEEREAAEMDVTCFRAVLQRIIAQEVRTYVDDLLARGALGFGFQSLPQKSAFD
BnGMYB39	Maker00066517	chr5	19880800	19882134	-	290	32706.6	9.49	nucleus	-0.83	MSILQHRKPDSEPLSGSQLSLSNHSFEVIGKSVDREPKFTSSQMGFQILSSDVFGEEKKPQVSKSSGRTKVCARGHWRPAEDTKLKELVAKHGPQNWNLIAENLHGRSGKSCRLRWFNQLDPRINRRAFSEEEEERLLASHRVYGNKWAMIARLFPGRTDNAVKNHWHVIMARKRRDESSVYKRRNNNSNNNNNKGSACCSDDVENEMTPKVVVDHMNCLHKNSSSTESTISITNIIDDQSTVSTCARLSLSRVAADHLSSNIAPPGFSTHFAPSSQPEKQKASHFLKTD
BnGMYB71	Maker00063010	chr10	3539429	3541624	+	269	30994.6	8.71	nucleus	-0.785	MCTRGHWRPAEDEKLRELVERYGPHNWNAIAEKLQGRSGKSCRLRWFNQLDPRINRSPFSEEEEERLLASHRIHGNRWAVIARLFPGRTDNAVKNHWHVIMARRCRERSRLYAKRAAHQTLIVNSNISGVSERKSSTKQDVNFRFPIDMMINCDRMSSKINVVANSNFVENVNYSEKYSNNNKYALPFPKEFCFQDSSPCITVHDQEKAHQPIEFYDFLRVNAESNGSEVIDNGRKVEDEEVDQAATLGKNSNGGASFIDFLSINGSSS
BnGMYB10	Maker00091496	chr2	19748273	19750109	+	318	35483.7	7.25	nucleus	-0.725	MGRSPCCSKEGLNRGAWTAMEDKILTDYIKLHGEGKWRNLPKRAGLKRCGKSCRLRWLNYLRPDIKRGNITRDEEELIVRLHNLLGNRWSLIAGRLPGRTDNEIKNYWNTNIGKRIQSSSPKTTCRRVTPPRPTNNNTKPSSSPTHHHHPPASSPKCSRVVRTRATRCTKAVLLPPAPPNHQPRYDVVVDPDPTVNDDIDHHAQVTPSTAVDGHWPSSVHNSDGRDRSSPGGFAIGGDCDGEVNDRDHDFLFSDFLSVDCLQHFSDCFGDIVVSDQLGLDEHDVMIGHVIEPPTSSSDHRGGALLSSLIDPELDWLLD
BnGMYB38	Maker00066632	chr5	11373665	11377040	-	395	42781	5.57	nucleus	-0.484	MEPDPAILASAELAADASADDHDSAAAGGAASGDEGGGGKAARDRVKGPWSPEEDAILSRLVGKFGARNWSLIARGIAGRSGKSCRLRWCNQLDPAVKRKPFTDEEDQVIIEAHAIHGNKWAAIARILPGRTDNAIKNHWNSTLRRRCMDLEKVKLEPGNVLEDDSFDKTKASSEETMSYGDANSLRSMEGRDLSSVEHMADQNEVKFPAEIQLTHEVQEPPTLFRPVARVSAFSLYNPIDGHEPLPASRMSVVPIEGPLVQASKPDLGILKLLEADCGGRSVPHQCGYGCCQTQNGKNTHSSLLGPEFIDYSEPTSFPSFELAAIATDISNLAWLKSGLENSSVRAMGDAAGRIISHGPPVQRGRFEDSRTGDRLLFEERRGNLMGMKTNVLST
BnGMYB97	Maker00083096	chr13	8725382	8726119	+	245	26686.4	8.84	nucleus	-0.703	MEQTMLMGNNNNNNNYRPCSSSTSSTSDSSSSESTPRTGSKPERIKGPWSTEEDRILTRLVERYGPRNWSLISRYIKGRSGKSCRLRWCNQLSPSVEHRAFSAAEDETILAAHALYGNRWATIARLLPGRTDNAVKNHWNSTLKRRAARAPSHAGPPEDDFLGGPSAAGALELARASTEEREDPLTVLTLAPPGVSGAAASAAENQRAEGFPAGFWDAMRGVIAKEVREYVSSTFSESSGFHSNS
BnGMYB12	Maker00091361	chr2	19860611	19862378	+	309	34896	5.52	nucleus	-0.761	MGRKPCCSKELELNRGAWTAMEDKSLTEYIRLHGEGKWRNLPERAGLKRCGKSCRLRWLNYLRPGIKRGSITEEEEDLIIRLHKLLGNRWALIAGRLPGRTDNEIKNYWHTKLSKTLKPKCGTEESSPKSSPSHDQSSSEFAKKQRLSEPEPSSSDEDNSKKTSVVRTKATRFTKPVAVVPRMEDQASQRSSTTYNSTISEVGPLAGSHDQMMNLEEHSCQGLMADFAVDFDMDNDFLSGFFNTDWISELSCAENSGNRSLSESDVYNDIVEGNVNYEQTPALMPLSSDLESIVSLIETDDHLDNWLQV
BnGMYB96	Maker00024528	chr13	7020026	7021944	-	163	18515.3	10.08	nucleus	-0.806	MGRSPCCEKAHTNKGAWTKDEDQRLIDYIRVHGEGCWRSLPKAAGLLRCGKSCRLRWINYLRPDLKRGNFTEEEDELIIKLHGLLGNKWSLIAGRLPGRTDNEIKNYWNTHIKRKLISRGLDPQTHRPLNDAAPPPPPPAAAAAKLHASARLDFRNASPRARR
BnGMYB94	Maker00043647	chr13	4115657	4117411	+	291	33739.4	5.74	nucleus	-0.932	MGRTPCCSKDGMNKGAWTAEEDQILQDYINTHGEGKWRNLPKQAGLKRCGKSCRLRWLNYLRPDIKRGNITEEEEDLIIRLHKLLGNRWSLIAGRLPGRTDNEIKNYWNTTLRKKVKCPNITTDHKSKETSCTNYTTITKQSSTLKTQLATSTANDNHLQVTNQSSSEFRANDSSVQDPEDCAKIAVNTRGQESVRTRADLQNLVIPLDNFDVEEFLHSDHDFWKLCNVDHHDQREFDFDNIDDDHQARLIVDYDFRNVGSDDHRLMPSSSPVFFSEEMLMEHWSDHIRDD
BnGMYB21	Maker00055186	chr4	13281103	13283880	-	264	29502.6	8.98	nucleus	-0.636	MRKPCCDKEGTNKGAWSKQEDQKLTEYIKAHGEGCWRSLPKAAGLQRCGKSCRLRWINYLRPDIKRGNFGQDEEDLIIKLHALLGNRWSLIAGRLPGRTDNEVKNYWNSHIRKKLIKMGIDPNNHRLNQIQIVQAQIPVLRANIDNISHEQLKPSSTAIEGMSAEENHACMASSTPKSAHGESKNVVERANSDAGSCLEDETSAAGTSSGLNLDLTIAFPTRRRDELKLVEEIKTQSRECKLAKEVEMISSGVISSSPTLILFR
BnGMYB77	Maker00000907	chr10	9451117	9453114	-	310	35451.6	6.21	nucleus	-0.757	MSTISTKSSNTSSSEDDNTNELRRGPWTMEEDTILIRYIACHGEGRWNLLAKRSGLRRTGKSCRLRWLNYLKPDVKRGNLAPEEQLLILDLHSKWGNRWSKIAQYLPGRTDNEIKNYWRTRVQKQAKHLKIDAESAAFQDIIRRFWMPRLIQKIEGSSSASAAPIIVQNTLVPMPLDTNPQAQHNSPPQHNILRHENPVNMPGSSMNFEQCSDSESMNMSQMSHFSEYTNSPFQQMVSNINNDQSINNNDTTFLEGCTYDMDVFSSHTSVSQAKGLDNPVGVCHVEGGDWADNDFFASVWNMDELWQHKS
BnGMYB26	Maker00013653	chr4	19161697	19163230	-	355	39504.2	5.65	nucleus	-0.486	MGRAPCCDKNGLKKGPWTPEEDLKLIDHIQKHGPGNWRNLPKNSGLQRCGKSCRLRWTNYLRPDIKRGRFSFEEEETIIQLHSVLGNKWSAIAARLPGRTDNEIKNYWNTHIRKRLLRMGIDPVTHSPRLDLLDLSSILSSSLCNPSLLNLSSLLNTQALLNPELLRLVSTILSLNNNVKQEHINGNIAPEIFAQDILQGNNQVPPLVQPNIHDNQFQNSVQLDSNNGFSTAMTTQAMQSPIAVDRQLGLCSNNVTNLGGQENVVTNSNIATSSTLTDHLAADLPENSYFQSLLDYSDKDFGFESVLSTPSSSTTPLNSSSTTNVNSSAEDERESYCSNLFKFEIPESLDISDFL
BnGMYB79	Maker00033008	chr10	10495605	10498758	-	403	45040.7	8.37	nucleus	-0.908	MSIDVDGKDNNIMGRTPCCIRDGVKKGAWTPQEDQMLVSYIEQHGEGNWRSLPQNAGLSRCGKSCRLRWTNYLRPDIKRGQFSPEEEQAIIRLHSLLGNKWSSIAKNLPRRTDNEIKNYWNTRLKKRAFENENAARNSHSDDRNPAATRPKSKRNKNDHENRPKGSSTSFSEIASQAAQLPNERAISRPDSKEEKSSSEAKKAATSTLANVLNKMATTTNCPETEQRFIDAAKAVLAKSMSRDGNVGVTNSLSGCATSPTSTSTSTSSFIGFDQVAISSAFKEISSKKSILVTEPKRPLSASANLLNHMASRLALANRGHARGFVSNDHHDHDHDHQPSNEIDQSTSSWKELVDHQGNYANYLGDHDQDWISCFPYVDSTSNEYHWPYNNFLDVDLREA…
BnGMYB25	Maker00012681	chr4	19066496	19068021	+	301	33625.1	4.84	nucleus	-0.64	MVRTPSCDKNGMKKGTWTPEEDRKLVAYVTRYGCWNWRQLPKFAGLKRCGKSCRLRWMNYLRPNLKRGNYSNEEEEIIIKLHQSLGNKWSAIAAQLPGRTDNEVKNHWHTHLKKRVGPQQESQPSDKESDSSDSSIMISSTSDHHDHDDLDSDDHQGNINPAVLVLAPQILDGVSSSPSTIMSPQPSPSSSDEASTLTTESTNSATEIISSTDNNDLIAESNLVSSVINYSAVNINPFDAFSQFSDDFWTEPFLADNSYVPASDPLLAAALTGTEFLSPEFDANYLLFPDENLYLQEHVQV
BnGMYB28	Maker00000585	chr4	23348349	23350643	-	383	42342.1	6.8	chloroplast	-0.741	MGRPPCCDKEGVKKGPWTPEEDIILVSYIQEHGPGNWRAVPTNTGLLRCSKSCRLRWTNYLRPGIKRGNFTDHEEKMIIHLQALLGNRWAAIASYLPQRTDNDIKNYWNTYLKKKLNKQLTSQTGHNNSKEGFSSSQPTMSRGQWERRLQTDIRMAKQALSEALSPEKSSSSSSSILLPSLPESHDHHDLKPSTGLVSDKGLIKPDHQPQISSSSNNLYASSAENIAKLLKSWMRNSPPSKKAKLTSSAATTQSTNTSVSNNFATTTTYGTDSASSEQGTPSNITDPLANNNGIDLSEAFESLFGFDQSLESSNSDFSGPMSPEASLFQDDIHERKPCPSSAGGQLPLSLLEKWLFDEGVNQGKEHQSFSDMIIDENASFFLK
BnGMYB43	Maker00061978	chr6	10290658	10292087	+	275	31317.4	5.35	nucleus	-0.758	MVRAPCCEKMGLKKGPWSSQEDHILISYIQRHGHGNWRALPKHAGLLRCGKSCRLRWVNYLRPDLKRGNFSREEEETIIKLHELLGNRWSAIAARLPGRTDNEIKNVWHTHLKKRVKQSGHNVVVHQETSEQPQDEPGDQVLVSSSEKNDNTNEDYGPISPHQSSSIISDISLPVYSNYCDNSTNISDNNINNNASTMADYSPGNSIYEVDDNFWSEAFSTETYNSAFISSEVVDGFSSISDNQELLHFPLLETSSYNYEQNNIDDIWNFCSTAY
BnGMYB69	Maker00074230	chr10	1019453	1023019	-	426	48432	4.63	nucleus	-0.962	MGKGRAPCCDKSQVKRGPWSPNEDLRLITFIQKHGHDNWRALPKLAGLLRCGKSCRLRWINYLRPDVKRGNFTKEEEESIIKLHQTLGNKWSKIASHFPGRTDNEIKNVWNTHLKKRLSSKNNDPSGNESNKESSITTSSSTSSISSILSSQKQNSGEVQVEEESDPKRLCDEKKLTSHEEINNQDGGDEEINNQDGGDDDHVEKQAMHNEFSPQLAKDPKEQVISTTTSSDSSYGSNVSNGTTSTVQVISRQGDHNEELLMDTLMFDFDEPCDVSDLLSEVNKPDNIEENAMVLDQTLMPLEADNDFWGMLDSFDTNFFETNDNNLDQVHVLDNSKPCDNSIFAEEQNIEIDENKKWLRYLESELGLEGTTTTNEDQNQQVELNQNHAFEEVIVPENN…
BnGMYB22	Maker00040122	chr4	14058360	14061085	-	264	29488.5	8.98	nucleus	-0.637	MRKPCCDKEGTNKGAWSKQEDQKLTEYIKAHGEGCWRSLPKAAGLQRCGKSCRLRWINYLRPDIKRGNFGQDEEDLIIKLHALLGNRWSLIAGRLPGRTDNEVKNYWNSHIRKKLIKMGIDPNNHRLNQIQVVQAQIPVLRANIDNISHEQLKPSSTAIEGMSAEENHACMASSTPKSAHGESKNVVERANSDAGSCLEDETSAAGTSSGLNLDLTIAFPTRRRDELKLVEEIKTQSRECKLAKEVEMISSGVISSSPTLILFR
BnGMYB15	Maker00030668	chr3	6581413	6583413	-	486	54996.6	5.56	nucleus	-0.872	MEESDTIFSDAFFASYRTSEKPDHHHRQYPYSSRRPARPPSTAIDRFLSGQVSHLSNNGRLGAENIINNIDDGFSSVTNEHVNGAISTGCGDSSAWTMSQLDHEEDSFFDGICVDHINHDYGTVLIEDERIPNIGIGDMCPNPREEQVELLDGKDHHEMIMRKMISTTRAKKASSNNSVALIKGQWTDEEDRKLIKLVKQYGVRKWAQIAEKMVGRAGKQCRERWHNHLRPDIKKDSWSEEEEKILVEAHAEVGNRWAEIAKRITGRTENSIKNHWNATKRRQNSRRKSKQTDDQSKQKAGTKPQSSILQNYIRSKALNATKNAAVCTINSAASSTVTDHQDPPPEHWSADVERNTSAELSLSPLVVLPDHETYDDEVLFMQRLFMSNNSTVNVKNDDK…
BnGMYB32	Maker00077519	chr5	816883	818016	+	286	33039.4	5.55	nucleus	-0.836	MGGHHYCCRERQVKRGLWSPEEDQKLITYITNNGFSSWSTVPQKAGLDRCGKSCRFRWLNYLRPDVKRGRFTIDEEKLIITLHAALGNSWAHIAKYLPGRTDNEIKNYWNSWIKKKLHDQNPPSQTTITCDSSHQNQDLTSNTYEPQIDTFVHVPSPTNTNPMFGSSESNPGLEDLSRHQATGSDYRTFNNILENDQQQVQALHNEPFLGSFTFTSCLDTNYATQTSTQIEDSLVPEVDFRPWTNTIDEGQDNEIKELVYYPINVQQQHYYYSNFQFGNSFVEGSM
BnGMYB16	Maker00030423	chr3	7783264	7784718	+	292	32871.4	5.2	nucleus	-0.772	MVEDHHQSQEEIRKGPWTEQEDFQLVCFVGLFGDRRWDFIAKVSGLNRTGKSCRLRWVNYLHPGLKRGKMTPHEERLVLELHAKWGNRWSRIARKLPGRTDNEIKNYWRTHMRKKAQEIKKRAAANTNNNNPPRPPPSPSSSSSTSTDNSKSSSSSSSITTVESLPFLEATTGVESFYDTGGRPAAEEEGGSCYSMDDIWKEISLPDVNAMSMTMDPLAETMLELEGNNSQDNFVCNDVVQEMDQFYCSDSLWKMDDDEASKPITTFVNNAYDTAFSAGFGASEETILTSGS
BnGMYB82	Maker00069320	chr11	167320	169493	+	239	27545.1	9.22	nucleus	-1.025	MEDKRVKKLPKKHLWKPEEDLILKKYVETHGEGNWATVSQQSGLMRGGKSCRLRWKNYLRPNIKRGGMSQEEEDLIIRMHKLIGNRWSLIAGRLPGRTDNEVKNYWNTHLNKRCPRRRRKLADTNSNQNNSHSSEKTAKKNKTKDPNPTITKTQNTTTDKLEQREEEENSTLQNPSSMGDTKGFDYGIESPIMAETSSMFVFDAEPLPTYLESFLFFEAFGCTAGEESYAEIGMRSVIP
BnGMYB64	Maker00010012	chr9	3652362	3655148	+	275	31666.9	5.03	nucleus	-0.855	MVRAPCCEKMGLKKGPWTPEEDQILTSFINTYGHGNWRALPKQAGLLRCGKSCRLRWINYLRPDIKRGNFTREEEDTIIKLHEMLGNRWSAIAARLPGRTDNEIKNVWHTHLKKRLNKNSPKNNNNNNSSNGHSEENILTRTISTASTIDTDQLEPITSNMSPQSSSSDLTSATEASSFAFDHEINNNNNNHNHEDEDLIIIKEEINSMEYQFQESTTYFAEIDESFWSDLNVPSEPLQIQDSFHDDFSNNIEHDMDFWFDVFIRSGGSPELPEF
BnGMYB8	Maker00016119	chr2	5890391	5892086	-	314	35366.9	5.35	nucleus	-0.636	MEGKKEEGIRKGPWKAEEDEVLINHVSKYGPRDWSSIRSKGLLQRTGKSCRLRWVNKLRPNLKNGCKFSLEEERVVIELQAEFGNKWARIATYLPGRTDNDVKNFWSSRQKRLARILQTSSTPHSKPHKSKTQLSASHELPILEGRGFSSSSEGEISSKILSCSSSSNENSEIIKMVSLPDLIKPKLVSFEQDLICQPQAIDQAEKNLCIDSQPLVPSPPTTIQPQLDLGFTSESHELLARLDPYYDMFGPFDDPKLENGPELPFGIPFIEPVESCRSGGKTEFDNSPTPDCFFDDFPVDMFDQIEPLPSPSDL
BnGMYB42	Maker00083753	chr6	8937000	8940532	+	315	34922.5	5.35	nucleus	-0.403	MRMSFLLITSKTIMAMEAGVLYLNLQFAFWKPKCITSLLRCGKSCRLRWTNYLRPDIKRGPFTQEEEKLIIQLHSMLGNRWAAIASQLPGRTDNEIKNLWNTHLKKRLLCMGLDPQTHEPFTLNHCPAAGASSPASPATRHMAQWESARLEAEARLSRESSLFGPPPQPCSKTDSDYFLRLWNSEVGDSFRNLAKREGVKAEEPDCHGSPASQASSSTKCGSVSALTTEVDPACAAGQGATPVEKTEFCTEEHCAMAAQSDCSSSNDMEDESDTALQLLLDFPINNDMSFLEGNCDDYACTDRAMFSENSFLCPL
BnGMYB68	Maker00073830	chr10	284384	286912	+	430	48349	5.3	nucleus	-0.78	MSVMNSNNGNGNGNAKMNNNIAKVRKGLWSPEEDEKLMRYMLSNGQGCWSDIARNAGLMRCGKSCRLRWINYLRPDLKRGAFSPQEEDLIIHFHSLLGNRWSQIAARLPGRTDNEIKNFWNSTLKKRLKQTPSSSSPNDSNSSADHQPTIDHHDQDHDHDRDYDHDHNMVMVGSTIDGGAMIMPASSSSNMMMVGHVDSSCSSSSASMQAGNISDNYQFDPFYTCDHVMLDYSTHVQYDCMSHADHVNRPTCLSQVGHNNANIMGSSELGFEDHEDVGGRNCAIFEAGNYKMHMGQLIDDHDQRDLVSLPSLESRSNIVTIIEEKINNSNNFAHDNDQDQVDIKGFYNNNNNSHQYLMNSTTSIGNYCFNNNNNNNMAHDNFKGEGMLGFGNNNSSSIG…
BnGMYB9	Maker00065771	chr2	11044625	11046572	+	377	42021.8	6.12	nucleus	-0.564	MGRAPCCDKNGLKKGPWTPEEDQKLVDYIQKHGYGNWRTLPKNAGLQRCGKSCRLRWTNYLRPDIKRGRFSFEEEETIIQLHSILGNKWSAIAARLPGRTDNEIKNYWNTHIRKRLLRMGIDPVTHSPRLDLLDLSSILSSQISMARFLGAQSQQQQEHHQVLVNPELIKLATSLMSSSPSCSSSSHHHQRGLISSSNNHQNPYLQNDQNYQLCGGVGGGANLIISPHLQQLVQNNQLLFQDQQVQACPTLEAASFGSPSSRISEWQSCNSAMPNLSTDFQEDLDNYVPVLPGYGASTSAYNYGQEQNLSFAAATASVFSTPSSSPTTALNSNSTTTTTTTTTTYLDQDEPAAESYCSDMFKFEISDILLDVNYEFM
BnGMYB103	Maker00022368	Contig161_1	238190	239863	-	368	40547.9	6.05	nucleus	-0.711	MGRPPCCDKVGIKKGPWTPEEDIILVSYIQEHGPGNWRSVPTNTGLLRCSKSCRLRWTNYLRPGIKRGNFTPHEEGMIIHLQALLGNKWAAIASYLPQRTDNDIKNYWNTHLKKKLKKFQSALDPHNNINMPSDQSVISTAHHQFLSNRNTTTTTSLSDTKRALDNTNITSHSGSSDHLPNHFALKNSSSSSNNSSSTYASSTENISRLLEGWMKSSPKANTAGTIDESRGELAPNKSIISENGATPSGNRDGLIMKTEEQPGEGGDLASVHEDFESILSFEGLNNNVSSSTWERSSTCGDDSTPNFKGTCVAAGEDHHHEDDEIKVHHVVIKGNPPLSFLEKWLLDETSTSATAGQVEEMMELSTMF
BnGMYB23	Maker00067925	chr4	14497431	14499747	+	286	32060.3	4.56	nucleus	-0.648	MVAEVELSDKDFARVKLIGFILTNGQCCWRAVPKLAGLLRCGKSCRLRWTNYLRPDLKRGLLSDYEEQMVIDLHAQLGNRWSKIASHLPGRTDNEIKNHWNTHIKKKLKKMGIDPLTHKPLSSLVLTDDHSHPSKRQLGPCSDQNDESQSNEISTTTTTTPFQSESSSNQEADNNDNDNDDDDGTMVDCDLIDYVSFSTDDVPLAQPHEIVVSCQNDNDNAPSSSSSSSSSSFSSGSPPFLEDFQIADFELPLYGGGSDEMLGLCDYLDFNGWDLEQEFYRMGFFE
BnGMYB4	Maker00076082	chr1	4923550	4924934	+	272	30363	5.67	nucleus	-0.654	MGRQPCCDKLGVKKGPWTAEEDKKLVNFILTHGQCCWRAVPKLAGLRRCGKSCRLRWTNYLRPDLKRGLLNDAEEQLVIDLHARLGNRWSKIAAKLPGRTDNEIKNHWNTHIKKKLIKMGIDPVTHEPLNDQISSSTGTTPQLEKPCSTHEGSNQQELVDQEMSINGVINIGTNSNFDNPINASLQNENSSTDESQPLNPNAFDDPLMSYLLSETALLEDSSWNFPVSSTSGKYCSDFGVSSSSSDHESSTWFLGSAKDLGDDGELWAWFLQ
BnGMYB57	Maker00064788	chr7	19488577	19490565	+	274	31553.1	7.11	nucleus	-0.509	MCVCIYIYIYIYMKMEAEMKQYHKRGLWTEEEDRALLEHIKAHGIGQWNRIPKLTGLKRCGKSCRLRWLNYLSPNVKRGGFSEEEDDLIIRLHKLLGNRWALIAGRVPGRTDNQVKNHWNTNLSKKLGITSTKKQSRKVLFHNVIMSKQKLVSTNINSTPTTNISDQPIDSHNTIAMTPVEEAGGQNCNVIMGRALENNNIVVANDQGKPEEFEVPLECARNEIFGPESPLMMRDDRDFSDIILSSNPGNSIVEFLDGFCIPELDDHQMYWHYF
BnGMYB92	Maker00043616	chr13	3326891	3328991	-	394	43547	6.76	nucleus	-0.508	MGRAPCCDKANVKKGPWSPEEDAKLKSYIEQHGTGGNWIALPQKIGLKRCGKSCRLRWLNYLRPNIKHGGFSEEEDNIICSLYISIGSRWSIIAAQLPGRTDNDIKNYWNTRLKKKLLGNKQRKSHLRGTSSSSSTGHLMMNKKEIAKRPLTAGIMVNYNSMDQVMMSNSTIVSDQIINPYWPELPVLQAAPVQYSSELQPRCDDHASIRKLLIKLGGRFSDGDHHHDHDNISTQPPIINGNIASGTTEYPTQVVFPHVYHEFSGNVMISASAPPPEFGPHSVQYNDTSTHTTTTTTTAPLVAAELEGPVYSENPTQAQMLLDGMEFLYSGINGSSCAGTEDISWGEMSSLLYSNSVPIISSASDHFEGVQREVLSSQDHHCIFGQSSFPNKAQ
BnGMYB62	Maker00087523	chr8	13413562	13415716	-	327	36901.4	5.84	nucleus	-0.611	MGRRPCCAKVGLNKGAWSAMEDKVLSDYIKLHGEGKWRDLPEKAGLKRCGKSCRLRWLNYLRPDIRRGNISSEEEDLIVRLHKLLGNRWALIAGRLPGRTDNEIKNYWNTNLRKKVQLNDRALDDHRFSNHVVRTKAFRCTKAVKIPRLLDHHASVSGTVTLIGGQKNSESRTNSSQDINLKGDDDCCADFLSDFDIDDLLIMSDVLNPDGEKLESSAGGLINVGGESTSLKHVTSWTSELEDKVGFGDDFYYQAKSELDGLIMNSTEATMKSTNWSDSDHIYRPSREGFHDINELSSFLNIAEGEEDIPWNIISDEIHQTTSYIAL
BnGMYB33	Maker00077618	chr5	825895	829100	+	359	40290.9	6.12	nucleus	-0.581	MGHHSCCNQQKVKRGLWSPEEDEKLIRYITTHGYGCWSEVPEKAGLQRCGKSCRLRWINYLRPDIRRGRFTPEEEKLIISLHGVVGNRWAHIASHLPGRTDNEIKNYWNSWIKKKIRKPLSSSTPSTTINANSTTATPISDHPQISCYTTISQLDFLTQDHLGPTKPITNSAQDHHQTHLFSSSLPLFMFDTTALEATAENNNNNPNTTTRGELFQEILTMGSLNHETTTSSSWNLNQHQVQALPPSNSLVMPSFSSNMNMSTYLPPLIDNVVCMDNNMGVHVEEGDHQIALECLQRHELNELWVESQVQHCSNNNSFLFWENVVAESGSNIGAENHNIISNAPPSANSGMSSSFPSSL
BnGMYB54	Maker00064417	chr7	17832358	17834864	-	435	46063.8	5.9	nucleus	-0.532	MGRSPCCEKVGLKKGPWTPEEDQKLLAYIEEHGHGSWRALPAKAGLQRCGKSCRLRWTNYLRPDIKRGKFSLQEEQTIIQLHALLGNRWSAIATHLPKRTDNEIKNYWNTHLKKRLTKMGIDPVTHKPKTDTLGSSSGNPKDAANLSHMAQWESARLEAEARLVRESKLIVTTNTNANANGGGAQLGSAPAQPHHQFIGKAGGSAPPPPCLDVLKAWQSSWSSSANKSNNNNNSNTNSNALMCMLAVDDLESPTSTLNFPDGHHSAGAAGFAAMQAALGAFGDDNNNNNDNDGDDEDNNNNNTVSFHDIHSAFGCTDSSNSANWFLEGLIRNNNVSNIMDSVVTAAAATTAAATTPLTGLSNIMENFSDVFAYAPDDIANASAAAVGGGEGGGGGGDGS…
BnGMYB56	Maker00064534	chr7	18427065	18432794	+	494	55509	6.3	nucleus	-0.761	MQINSTTNNNTTKKKTCSSGNEDSKKKERHIVSWSQEEDDILRQQITLHGTENWAIIASKFKDKTTRQCRRRWYTYLNSDFKKGGWSPEEDLLLCEAQKIFGNRWTEIAKVVSGRTDNAVKNRFSTLCKKRAKYEALAKENTTSYMNSNNKRVMLRSGFSADEASEIVGSAKKMRRTHIADLTGSCDYRDRLHKPCRTTTINQQLRAPFTVLVQNSHNINKLPAQHHVNVTKEIATADAQNNKYEGSFLKKDDPKINALMQQAELLSSLALKVNTENTDQSLESAWKMLQDFLNQSKESDILGYRISDFDFQLEDFKDLLDDLRSGNEVSQPSWRQPDLYNESPDSSEYSTGSTIMSHTTCNKQEQTQAELGASEQDIGHVSQSMAIGEESCVGECDKG…
BnGMYB61	Maker00087187	chr8	13392950	13394368	-	313	34590.9	7.1	nucleus	-0.549	MGRSPCCSKEAGLNRGSWTALEDKILTDYIKIHGEGRWRNLPQKAGLKRCGKSCRLRWLNYLRPDIKRGNISPDEEELIIRLHKLLGNRWSLIAGRLPGRTDNEIKNYWNTNLGKKVHLHHQSINTCSTAKIAKDIVPCGPSKAENPSLSPGLATPPSPGRVIRTRAVKCTKVLLNDGGRGDVSDKDAAPRGAPSTAFSEGNFDNSSGADPGLGPDIGAGVCDIGNVVIPSRAGSDANFDVDELFLADLPMNSEFIRRDEYFRDFSYVTMSNNAIASKDFHRDNHDHYDHDFLFSEELTLPDWTSSVVFSLAE
BnGMYB37	Maker00017016	chr5	10205567	10206658	+	363	41524.4	9.27	nucleus	-0.775	MKERQRWTSEEDALLRAYVKQYGPREWNLVSQRMNATLNRDAKSCLERWKNYLKPGIKKESLTEEEQRLVIRLQAKYGNKWKKIAAEVPGRTAKRLGKWWEVFKEKQQREQKENNKTVDSIEKGKYDRILETFAEKIVKDWPAPAYLMATSNGGFQHTDPASAPAQATLLPPWLSSSTGSPVIRPPSPSVTLSLASSTVAPVSPPIPWMQQQTESGPLVIGNFPSSYVAPVAIPGCGESAVVSELVECCRDLDEGHRTWAAHKKEAAWRLRRVELQLESEKACRRREKMEEVELKVKALREEQQAALERIEVEYREQLVGLRRDAEAKEQKLAEQWAAKHARLTKFLEQMGCQPPRLTEPNGR
BnGMYB53	Maker00034258	chr7	12245709	12247370	-	316	35694.4	5.26	nucleus	-0.604	MEGKKEEDIKKGPWKAEEDEVLISHVSKYGPRDWSSIRSKGLLQRTGKSCRLRWVNKLRPNLKNGCKFSLEEERVVIELQAEFGNKWARIATYLPGRTDNDVKNFWSSRQKRLARILQTSSTPYSKPHKSKTQVSASHELHILEGRSFSSSSEGEISSKILSCASSSNENSEIIKMVSLPDLIKPKLVSFEQDLICQPQVIDQAEKKLCIDSQPLVPFPPTTIQPQLDLGFTSETESHELLARLDPYYDMFGPLDDPKLKNGAELSFGIPFTEPVESCRSGGQPEFDDLPTPDCFFDDFPVDMFDQIDPIPSPSDL
BnGMYB19	Maker00071853	chr4	9337667	9341217	+	431	47107	6.91	nucleus	-0.746	MLNSEKRAAAAAATTATEEAEAGAVAVIKKGPWTAAEDAVLTEYVRQNGEGNWNAVQRNTGLARCGKSCRLRWANHLRPNLKKGSFSQDEEKIIIELHAKLGNKWARMASQLPGRTDNEIKNFWNTRMKRRQRAGLPIYPHDQLQQLLLHQTLQYNSGQNLTSHNHNHNQNPLIKPITDPTNHFNFSHPIISNNSQVSQFVPLNNNHHNTISSASPYSFQYSSGNLSSMVISGAPYEPVPELPSSQTPASSSDDRASGGESYRFDDVVLGQFKRSWLGKSGLLGDLVVEGRAMSRNKRARRTNAGSPEGRGKGAAARREEPEESTENRTENFSSGDQSSIGIEHGEDPIDVSSMDDDLMSLLTNFPSSATPVPEWYSGGGDSTVLSGSEIPGIATSGAD…
BnGMYB49	Maker00091900	chr7	8050731	8052299	+	193	22235.1	5.39	nucleus	-0.63	MHSVARDNVAYHLKSEEESELRRGPWTLEEDTLLIHYIARNGEGHWNLLAKRAGLKRTGKSCRLRWLNYLKPDIKRGNLTPQEQLLILELHSKWGNRWSKIAQHLPGRTDNEIKNYWRTRMTSDDVPMDCIENCFGNYVDMKISEYGIEGLNLDPFSEVGANIDISGVDYPVAAGDWTLDGEACDPFWNMGEI					whole_GLEAN_10028591		whole_GLEAN_10007120
BnGMYB51	Maker00089493	chr7	11649846	11651512	-	299	33830.5	5.69	nucleus	-0.6	MEGKKEEGIKKGPWKAEEDEVLISHVSKYGPRDWSSIRSKGLLQRTGKSCRLRWVNKLRPNLKNGCKFSLEEERAVIELQAEFGNKWARIATYLPGRTDNDVKNFWSSRQKRLARILQTSSTPYSKPHKSKTQVSASHELHILEILSCSSSSNENSKIIKMVSLPDLIKSKLVSFEQDLICQPQAIDQAEKKLCIDSQPLVPFPPTTIQPQLDLGFTSESHELLARPDPYYDMLGPLDDPKLKNGVELPFGIPFTEPVESCRSGGQPEFDDLPTPDCFFDDFPVDMFDQIEPLPSPSDL
BnGMYB31	Maker00000820	chr4	25161650	25162989	-	324	36986.7	5.36	nucleus	-0.907	MGRQPCCEKIGLKRGPWTIEEDHKLMNFILNNGIHCWRMVPKLAGLLRCGKSCRLRWINYLRPDLKRGGFTEMEENQIIQLHSRLGNRWSKIAAHFPGRTDNEIKNHWNTRIKKRLKQLGLDPVTHKPIDDHQEKENVDQEEDDQDHDHEQKSDTTSTHDHQNDSAQSSTKPVSISSSGQENGLSSSEAKFSQDHEKSKVTITSTNSVDTTSDVDDLAKMNYYDMISLNKLDNLDHTWMNNQEIITVNNNNNVVTASYSTSSFSVEESNNNNPNSVGESPSLQADSLQQWVDYGATTVENSILSWEYGLNLDQQDLFFFGNCPF
BnGMYB44	Maker00080208	chr6	10875746	10877925	-	246	28064	5.92	nucleus	-0.843	MVRAPCCEKMGLKKGPWSSQEDHILISYIQRHGHGNWRALPKHAGLLRCGKSCRLRWVNYLRPDLKRGNFSREEEETIIKLHELLGNRWSAIAARLPGRTDNEIKNVWHTHLKKRVKQSGHNVVVHQETSEQPQDEPGDQVLVSSSEKNDNTNEDYGPISPHQSSSIISDISLPVYSNYCDNSTNISDNNINNNASTMADYSPGNSIYEVDDNFWSEAFSTETYNSAFISSEIDDRNKYLIDQWAS
BnGMYB84	Maker00041645	chr11	4139987	4142019	+	390	43158.9	6.27	nucleus	-0.665	MGRAPCCDKANVKKGPWSPEEDAKLKAYIEKYGTGGNWIALPQKIGLKRCGKSCRLRWLNYLRPNIKHGGFSEEEDNIICSLYISIGSRWSIIAAQLPGRTDNDIKNYWNTRLKKKLLGRRKQSSGAARLSSANPDLKDYSGTASGLEDTEALSSSALERLQLHMQLQSLQNPLSFYNNPALWPKLHPFQQKMIQSFQSLNGMISPNPNTLIAQHSLITSPDHHDHDHHDAPVAQGQEADFYSETPKANNAAATEAGFAKIGHNNASNNIPMDSSADHHLVLANSGDHSAFQAELETILNGEAVSFNVPQGNQNHVHHHNHPMADFDCFKEMTNVSKDATMISSSWWSNELINDAKSASSGSWDSSSAVHQLDDQSNGMFHDYDQLGYGL
BnGMYB7	Maker00076183	chr1	8565288	8567809	+	423	46422	6.9	nucleus	-0.513	MGRSPSCDENGVKKGPWTPEEDQKLMDYITRNGHGSWRALPKLAGLNRCGKSCRLRWTNYLRPDIKRGNFSDDEQKLIINLHAVLGNKWSTIAGHLPGRTDNEIKNLWNTHLKKKLVHMGIDPVTHRPRTDLNNVLSNLPHLIAAANFATTFLSTRAPASWPDVMSAAAALRSLPCSYPDATQQAKIQALILQLLGSNNNGPCCGIPATTNTNTSYSSMEADIYSLLGLASCSSSSLVPEHHQCDVDDYLRAIEESCGRQLESAAGFTTPPQHHILHSSTRTATTCFPDTHHHRLPTSTAAAAATTSAGNVVQPQPDVSMIINNMPTHCYQQLPQLVVPNSPTSSPALPHTHTHTSPDSPKPLSHYKITQTTKLNPVHNHDNITSNPNSSTNSTSFIPA…
BnGMYB24	Maker00039955	chr4	14896558	14902068	-	201	22905.4	5.99	nucleus	-0.374	MVAEVELSDKDFARVKLIGFILTNGQCCWRAVPKLAGLLRCGKSCRLRWTNYLRPDLKRGLLSDYEEQMVIDLHAQLGNRWSKIASHLPGRTDNEIKNHWNTHIKKKLKKMGIDPLTHKPLSSLGEGCVERFKAEILNLAPPGESQEELIELFSRELPPGIKELYLTPLNFDSIDEVLLEALEIAYYTGSNDNMPDYTPLD
BnGMYB102	Maker00032881	chr14	16835169	16837399	+	332	37263.1	7.16	nucleus	-0.753	MGRAPCCDKANVKKGPWSPEEDAKLKQYIEKHGTGGNWIALPQKVGLKRCGKSCRLRWLNYLRPNIKHGEFSDEEDRVIINLFANIGSRWSIIAAQLPGRTDNDIKNYWNTKLKKKLMGIINNQSPTQTQLMRKLPINTVSSTNNISSSSPYLLHPSSYITSPFNTQQQQQQSGSLIINNSSTTDHFEPNNISALNSSMNNLQVPQDQSFLSQMQHFNHQASCSSSDGSQYNNNSFHGSVEERVNNLVSSTGSVVLDYGNSSQSTGATDHYHNHHQVLSDDSVLDYGLEEIKQLISSSNVDSSTTNSSSCSNNFLFDENKTGQERVLYYYYY
BnGMYB101	Maker00032889	chr14	16721818	16723601	-	232	27180.9	6.02	nucleus	-1.078	MQIVEQDDQLRKGTWLEEEDERLVSFVQFMGEKKWDTLAKASGLRRSGKSCRLRWLNYLRPNLKHGQISVEEEKIILQLHEQWGNKWSKIARRLPGRTDNDIKNYWRTHLRRKVVQVQENETNKSKEDFLFESKKNESSPKKHNNYENNTHDHNCGSSVLEGFLGTRLDNSCEASTISADFALTSSPYENRFSDWISEYSNGQSEMNNQNHEQSCISVEYSSSSEFTENYSV
BnGMYB104	Maker00031449	Contig177_1	38534	39876	-	292	32880.4	5.28	nucleus	-0.771	MVEDHHQSQEEIRKGPWTEQEDFQLVCFVGLFGDRRWDFIAKVSGLNRTGKSCRLRWVNYLHPGLKRGKMTPHEERLVLELHAKWGNRWSRIARKLPGRTDNEIKNYWRTHMRKKAQEIKKRAAANTNNNNPPRPPPSPSSSSSTSTDNSKSSSSSSSITTVESLPFLEATTGVESFYDTGGRPAAEEEGGSCYSMDDIWKEISLPDVNAMSMTMDPLAETMLELEGNNSHDNFVCNDVVQEMDQFYCSDSLWKMDDDEASKPITTFVNNAYDTAFSAGFGASEETILTSGS
BnGMYB11	Maker00091416	chr2	19774414	19775638	-	249	28380.9	9.07	nucleus	-0.884	MAKMTERSRDMKSLEAENKTGKPNIVKKDLQVNKGAWTAEEDQKLAQVIAIHGAKRWKTIAAIAGLNRCGKSCRLRWLNYLRPNIKRGNISDQEEDLILRLHKLLGNRYMVRWSLIAGRLPGRTDNEIKNYWNSHLSKKINHDKDNKQRRPIIVSSTARSDKQGGSINDEKRASTVQKVHSTCTEATKGETNNNCISNNNYAPEGNYSSTHEGSIINGSDFDVDDFFDFSDEGPLNLEWMSEFLELERT
BnGMYB30	Maker00000810	chr4	24581654	24584893	+	345	39314.6	9.45	nucleus	-1.108	MDFLDLGSSSSSSGNKINNILPDDDQDHDQVAYIATPDQAGSDEKRVGHNHQRIRSRRNNNNNNTVHIVRRTSKAQKKPTVIKGQWTPQEDKVLLQLVGKYGTRKWSKIAKILTGRVGKQCRERWHNHLRPDIRKDTWSEEEDMILISAHKEVGNRWAEIARRLPGRSENTIKNHWNATKRRQNAKKMRNRDPSSLPNLSPLQSYIRSITPLNDTKNAVVSPTAAANLTIDINAATTAPSVDTDNGAVQFQLAADAGREGANDKSLYSESYGYRSFLEEMSFVESAIVLVDDDDDGRRRESSKRRDEDGDREPHERPWRCHQEGDGHHGDDRPRKALKRHRVPLM
BnGMYB14	Maker00025443	chr3	5756947	5760054	+	358	40079.3	5.88	nucleus	-0.699	MRKPGDQQGSNSGKSNSNNMSSSGSSKLRKGLWSPEEDDKLMKYMLSNGQGCWSDVARNAGLQRCGKSCRLRWINYLRPDLKRGAFTPQEEDLIIHLHSLLGNRWSQIAARLPGRTDNEIKNFWNSTVKKRLKNMSSSSTSPNTSDSSFELKESVEAAVRLNIPCRHENGVFSTYNLQNSSPTSVHNHAILPLPMIEHAALNNNNNNNNMFGSNLSYFNPSSSCINMAQIGLGSDGFFGSENIGVLSSANIGSESDIFVPPLESISTDQESYKIYDDNDHDQVIRNSNNNYMIMNNINTILNCNTKTKLAHHDQNQLSHGVENSYNFQAHDQLTVGDWDLEDLMKDVSSFPFLDFQIE
BnGMYB58	Maker00064504	chr7	20532220	20533521	-	252	28460.1	8.55	nucleus	-0.722	MGRKPCCDKVGLKRGPWDTQEDQKLVNFMLHNSNQSWRLVPKLAGLKRCGKSCRLRWINYLRPDLKRGDFLEEEEDQIIQLQSSLGNKWSKIASHFPGRTDNEIKNHWNCKIKKKLKRIGLGSSQKMIKHEEGSAKSTSCDQEQLVMSKLGPQRVHNSPNSGSKENDMIVTCGSSNVNYINGCDKLDLSLSSSSSSLSSSSLTSTVLQSDDHYSSIMSSSNYYWRESSMEMESLLSLEGFDKLEDVISLVDN
BnGMYB20	Maker00062204	chr4	10303665	10307995	-	426	46694.4	6.24	nucleus	-0.77	MDEAEAGAVAVIKKGPWTAAEDAVLTEYVRQNGEGNWNAVQRNTGLARCGKSCRLRWANHLRPNLKKGSFSQDEEKIIIELHAKLGNKWARMASQLPGRTDNEIKNFWNTRMKRRQRAGLPIYPHDQLQQLLLHQTLQYNSGQNLTSHNHNHNQNPLIKPITDPTNHFNFSHPIISNNSQVSQFVPLNNNHHNTISSASPYSFQYSSGNLSSMVISGAPYEPVPELPSSQTPASSSDDRASGGESYRFDDVVLGQFKRSWLGKSGLLGDLVVEGRAMSRNKRARRTNAGPPEGRGKGAAARREESEEAGGVVRGETESTENNWTDNFSSGDQSSIGIEHGEDPIDVSSMDDDLMSLLTNFPSSATPVPEWYSGGGDSTVLSGSEIPGIATSGDDAGHDI…
BnGMYB1	Maker00095444	chr1	1166235	1171456	-	593	65030.2	5.09	nucleus	-0.55	MCCSPLYAWILALLYRKLRSSIFAIFSALSSFDLEMSRTTNESDDGMFSKYHSESPLADESNGGSSGGGTMLKKGPWTSSEDAILVDYVKKHGEGNWNAVQKYSGLSRCGKSCRLRWANHLRPNLKKGAFTSDEEALILELHSKMGNKWARMAAHLPGRTDNEIKNYWNTRVKRRQRAGLPVYPHDMCMQGFQGNQLGQNPGGINSGDIGQHDPLQSSYEIPDVVFDGLKGNSDVYSYVSEIPDIPMSSMFVKSIASPPFYSFPPQTIHRQKRLRESSDVFPDASGCVNNGFPQFDQFQSDTCHKVASSFGPPFPHDLDPSQNLLSFDASQGGHSLPNGNSSASKPTDGSVKLELPSLQYPETDLGTWGTSPPLPLLESADAYIQSPPRVDAFESNCSS…
BnGMYB86	Maker00077137	chr11	16284320	16287251	-	465	50072.7	8.46	nucleus	-0.584	HRRKTQTQELKTFNSKFVCLARVVLSFRIAEGAMISSGSTGAGAGGGEGGGSSSGPAGSGSAGQSNSGGLLKKGPWTAAEDEVLIHYVRNHGEGNWNAVQKHSGLNRCGKSCRLRWANHLRPNLKKGSFTQDEERLILELHAKYGNKWARMASHLPGRTDNEIKNYWNTRVKRRKRQGLPLYPNDIHQHQQQQQLSSPTAITTTTPTPPTTPTNFPFQSPQIPFQSNNACFDPTLPFSFQYRPVPLLAAPLACFKPPPAAAYAPQASPSSPFVQFSATGGFDSCSVASSGAMAVKTELPSSQFHQNVVQTPENQRIHSGAGSLEDILDNLLDEAHISIEGSSEFLPKEEAKEHINSLPEDLSKLLNFAPPSAAATTLQLHPMVPPHHWYSHSHSGGGGG…
BnGMYB83	Maker00037560	chr11	3460065	3461916	-	390	43192.9	6.19	nucleus	-0.669	MGRAPCCDKANVKKGPWSPEEDAKLKAYIEKYGTGGNWIALPQKIGLQRCGKSCRLRWLNYLRPNIKHGGFSEEEDNIICSLYISIGSRWSIIAAQLPGRTDNDIKNYWNTRLKKKLLGRRKQSSGAARLSSANPDLKDYSGTASGLEDTEALSSSALERLQLHMQLQSLQNPLSFYNNPALWPKLHPFQQKMIQSFQSLNGMISPNPTTLIAQHSLITSPDHHDHDHHDAPVAQGQDADFYSETPKANTTAATEAGFAKIGHNNASNNVPMDSSADHHLVLPNSGDHSAFQAELETILNGEAVSFNMPQGNQNHVHHHNHPMADFDCFKEMTNVSKDATMISSSWWSNEIINDAKSASSGSWDSSSAVHQLDDQSNGMFHDYDQLGYGL
BnGMYB72	Maker00059272	chr10	5058806	5059531	-	330	36952.9	5.52	chloroplast,cytoplasm	-0.565	MEPPCCDKPGMKRGLWSEEEDAKMLEYVSKHGKGKWTSVPKKAGLRRCGKSCRLRWTNYLRPDLKHESFTSKEEELIVKLHAAIGSRWSMIAQQLPGRTDNDVKNHWNTNLKKKLANMGIDPVTHKPFSQIFADYGSIGGFSKPGMRIGSLNKDYLKNAIVMKTPNTLAMPMPIPSPTKAEPIQDNFLISHNMSKNQPSLDLLAQLQGINLVKEDSSTPSFRVEKGTLSSSLSPSSSSSTCSSAAQDLSPNIVPFNWNEFLLEDEFLPSEAQDCQEKESQVIESEETDYETNHIVSSNIEVNETSFVEALIAKESEMLMEFPDLLGGEFY
BnGMYB81	Maker00060251	chr10	11957981	11960767	-	328	36078.1	7.7	nucleus	-0.598	MQRLNKGVWTKEEDRKLLSYIQKHGEGGWRLLPQKAGLMRCGKSCRLRWANYLRPGIRRGEFTPEEEQTIIRLHAVLGNRWATISRHLYRRTDNEIKNHWNTRFKNRVANHTNITEEHPLAAKWASTEDSGENNSPISIEQVISGTTNSVASTYHSANTVDIDLTQSLQCSDDNNTINMDLILPNSSEGTCISSGGTTTSSATVRTNISDSDQAYSRSSSSPSSSARVLNKIASKMGQLNIRHASLDCSVGCSADGVPSSSTVGFNLRSPPTDSSATSKNIEGMFEDAALFQHADVFEGLPVKHPKYADYILISHDVTGMGTPPITPN
BnGMYB45	Maker00079675	chr6	14075964	14076880	-	297	33020	8.83	nucleus	-0.734	MEASTASSLQMQREVDKVKGPWSPEEDELLQSLVQRLGARNWSVISKSIPGRSGKSCRLRWCNQLSPEVQHRAFSAEEDDIILRAHAKYGNKWATIARLLSGRTDNAIKNHWNSTLKRKCASPSSSAAAAEDSALRPRKRLASAPPALLLPRSRHFPASATAPTEASPDQRPATDRLSLRRSAIESTQNDTKIDAYDRYDEEEEEPSTNLTLCLPGLGSAECHNREADHRREAAKTTPSRAEKSGVSFGPELLSLVQEMIRREVRDYMACFETNCEVSRNDGVRNVGVKRIGIAKLD
BnGMYB50	Maker00056555	chr7	10451064	10452650	+	339	38347.7	5.58	nucleus	-0.649	MHSVARDNVAYHLKSEEESELRRGPWTLEEDTLLIHYIASNGEGHWNLLAKRAGLKRTGKSCRLRWLNYLKPDIKRGNLTPQEQLLILELHSKWGNRWSKIAQHLPGRTDNEIKNYWRTRVQKQARQLNIESEGKGFADAMRCFWVPRLLQKVEQSSSTHCNSSTSLSTTVSNISSHENSAMFSLRNSDDLPENLVPSASSSSIINSQNKPIPFSSHPKGCLNSFRNQNFLSQDSVLSYTPENDEQPKPSNISHCYAFDKAHDQMTSDDVPMDCIENCFGNYVDMKISEYGIEGLNLDPFSFSEVGANIDISGVDYPVAAGDWTLDGEACDPFWNMGEI
BnGMYB41	Maker00090582	chr6	2857528	2858858	-	289	32066.6	9.01	nucleus	-0.495	MGRSPCCEKAHTNKGAWTKEEDDRLIAYIRAHGEGCWRSLPKAAGLLRCGKSCRLRWINYLRPDLKRGNFTDEEDELIIKLHSLLGNKWSLIAGRLPGRTDNEIKNYWNTHIRRKLLNRGIDPATHRPLNEPTAQDTTTASMKAATTTTTTTTTTISFATKEEEMVKSAINNNHVAVSKDLVVNSSVMSPVVQVQVQVQDIKFPDLNLELKISPPSTAQQPHHHHEKQKLMKREVGIGGLCFSCSLGLQNSEDCRCGIVGNGATSGASVGYDFLGLKAGVLDYRSLEMK
BnGMYB98	Maker00096205	chr13	14779440	14781440	+	337	38454.5	8.53	nucleus	-0.916	MEDSGGLHEAASSAENGAKSGCPRGHWRPAEDEKLRQLVEQYGAQNWNSIAEKLQGRSGKSCRLRWFNQLDPRINRRPFSEEEEERLIAAHRVHGNKWALIARLFPGRTDNAVKNHWHVITARKQREQSKICGKRSYQDFSNYYNNDSEASSGNFPAKNSHFRGDYFSLLGKNHMVNKDRVLFLDSNNFVNYSMTPTTKSGGTKLPTLEACFYVGRDQEDQYQRDSLFMNPSASTQNYYGSSWPNTCFDYIRGHRRPHHYGINRNICNIQRDQSLLLADDYNNSSCENVTPSINGIGKLRASAKMQGKEDDQYDQLSNIDAKDQVCFIDFLGVGVSS
BnGMYB75	Maker00049331	chr10	5829554	5831603	+	496	56343	5.61	nucleus	-0.741	MEFEAEFIRENKSYKCPPLLCENYEKPSKRCDLIIPIDQTPSPKTNYLQDFHPLDHDFNHFLAHNGSSSNPNFSSQTASFDPFEPYTHAGNSPNNLGFSGQSLTNNFQTSGDYNCLNLPCRNTNIDDMIINSSGSDWSCLPLNGQDIIEKPMSFVAPNQDQAISCITAENGYYKKVVAMNKSTITRTSLTKKKTFKGQNIKTNSVKGQWKGEEDRLLIQLVSQYGLRKWSHIAQMLPGRIGKQCRERWHNHLRPDIKKDTWSEEEDKVLIEAHVEIGNKWAEIAKRLPGRTENSIKNHWNATKRRQYSKRKPRSAKCPRASLLQDYIKSLNLDSSAKSTRQYYTRKAPLISSQLVINTNVNNSNNITEDPPIENRGDNRPKNRAADDSLADQDYIDDHV…
BnGMYB90	Maker00003213	chr13	2230302	2231156	+	284	31050.8	8.77	nucleus	-0.571	MESAKRESDRIKGPWSPEEDEALRRLVQSYGPRNWSLISKSIPGRSGKSCRLRWCNQLSPEVEHRPFTPEEDDTIVRAHARFGNKWATIARLLNGRTDNAIKNHWNSTLKRKCSSMSDDFDALDLHPPLKRSASVGAAVFVTPGSPSGSDLSDSSLPGGVSLSHSFRPIPITVAGPPSQPTDAASDPPTSLSLSLPSSDTSEVSNRNRVINHPPPPPTAPAAASQVGGGYEKQFFSAEFLAVMQEMIRNEVRNYMSGIEQNGLYLHTEAVRNAVIKRIGVSKIE
BnGMYB66	Maker00041853	chr9	8508232	8515429	-	227	25800.3	9.85	nucleus	-0.526	MLLLLLLIVLGIGHWRPAEDDKLRDLVQRYGPQNWNFIAEHLHGRSGKSCRLRWYNQLDPNINKKPFSEEEEERLLSVHRVYGNKWACIAKYFHGRTDNAVKNHYHVVMARRKRERRFSAATTSPTLNNNNNNNKKIAPISTTIRGRGVSLIHHGQFGRLYGGTTSSTISSGSECYKVFEEMSNERNHESVVLMNSSSTSSSAALLNKFSLKQVPFIDFLGVGIASN
BnGMYB29	Maker00000713	chr4	23843530	23845030	-	355	39437.9	5.67	nucleus	-0.563	MGRPPCCDKSNVKRGLWTPEEDAKILAHVSKHGTGNWTLVPQKAGLNRCGKSCRLRWTNYLRPDLNHDDFTPQEEEHIINLHQAIGSRWSLIAKQLPGRTDNDVKNYWNTKLRKKLSKMGIDPVTHKPISQLLSEFGNISGLPSPGHHVVVPRMETSSAITGLPSSDMIARLAKEQFQDCNSFSAMEFLSQLQVTNQHIIQPHFFNEVTSSSSSTSSSLVTADLASLRESYSRQQPQAQPLAPSPSLNWSEFLLREPYQHSDVAQQEQEDDFQGVLSSSSPVVSSQSEISVQKPANGSEFCSLNAGDFGSTVLGGQMNNQIENSSANSFVDTILDRDTELRSAFPEFLDGSLEYY
BnGMYB74	Maker00049342	chr10	5606615	5608518	+	234	26976.3	6.1	nucleus	-0.807	MKAHHENNEYKKGLWTAEEDRVLMDYIRVHGKGKWNRIAKETGLKRCGKSCRLRWMNYLCPAIKRGDFSEEEEDLIIRLHNLLGNRWSLIAGRVPGRTDNQVKNHWNTHLSKKLGIKKVKNKVMRVNSQPFSEDPQEKDYSIPSGASLSEQPNTGNYTGDQAGIIGDKVTRDIGSKSLLEDVMMMSDNNDDNYESSFRITSADDFLINPNYNSYYDVLEPLEEQCLDFVWDIGL
BnGMYB6	Maker00075734	chr1	5886242	5887842	+	295	33725.9	5.97	nucleus	-0.678	MVKKPCCDESEVKKGAWSPEEDQILVNYIKHHGHGTWHSLPKQAGLLRCGKSCRLRWTNYLRPGIKRGPFSHEEEKAIIRLHGMLGNRWAAIAMQIPGRTDNEIKNYWNTHLKKRLISLAENFQESQFSSTLDHPNTFEFRSSTTRHMVQWERARLEAEFRLSMESSLHTSSPDPIVDHFLLLWSSEVGRSFREVNVKEGTLGQNPASQTCSMEKIGYVKRNASSDMIRELEDGSIRPQGEDVIGCLDFPSHEELSDSADSVSELLLDFPSGYDLDFFEGKDVDFPIPPPNRKPD
BnGMYB47	Maker00042256	chr6	18940362	18943120	+	357	39654.9	6.67	nucleus	-0.791	MTRKPGVGIKRGPWTAEEDEVLAGFVRKEGEGRWRTLPKRAGLLRCGKSCRLRWMNYLRPSVKRGHIAPDEEDLILRLHRLLGNRWSLIAGRIPGRTDNEIKNYWNTHLSKKLISQGIDPRTHKPFKPDTTAKASSSSCKTGEDQYRPKIIHSDRNNPKNAKQKSQPARPLINRELDHDFVKALSHGGGGTQTNATQVSNEAFTSCSLVNDDHQYQMVSTTTGKLANFHGYQNLILNSEGSDNNNNNIGFGTSSTIGDQTNLVVGNEDHDHGDDLNYCSDDMFSSFLNSLINEDAFIAPPHQNQLPNIHGNIAPFPSSADPFLSTNTAASNGWETAILSSDALDQINDSQRVDDPME
BnGMYB17	Maker00029953	chr3	8593243	8596081	+	395	42802	5.5	nucleus	-0.491	MEPDPAILASTELAADASADDHDSAAAGGAASGDEGGGGKAARDRVKGPWSPEEDAILSRLVGKFGARNWSLIARGIAGRSGKSCRLRWCNQLDPAVKRKPFTDEEDQVIIEAHAIHGNKWAAIARILPGRTDNAIKNHWNSTLRRRCMDLEKVKLEPGNVLEDDSFDKTKASSEETMSYGDANSLRSMEGRDLSSVEHMADQNEVKFPAEIQLTHEVQEPPTLFRPVARVSAFSLYNPIDGHEPLPASRMSVVPIEGPLVQASKPDLGILKLLEADCGGRSVPHQCGYGCCQTQNGKNTQSSLLGPEFIDYSEPTSFPSFELAAIATDISNLAWLKSGLENSSVRAMGDAAGRIISHGPPVQRGRFEDSRTGDRLLFEERRGNLMGMKTNVLST
BnGMYB76	Maker00049451	chr10	6241615	6243976	+	417	46344.1	6.74	nucleus	-0.652	MGRHSCCLKQKLRKGLWSPEEDEKLFNYITRFGVGCWSSVPKLAGLQRCGKSCRLRWINYLRPDLKRGMFSQQEEDLIISLHEVLGNRWAQIAAQLPGRTDNEIKNFWNSCLKKKLMKQGIDPATHKPMSESELSKDKVINVKRSLDHKDSSTTHHQPPNHQQQQQLGLSGTNVSTLASSHGPAFLVSDSPYFDSAPLVLSEAPKPHHQSFITNNNNNSSLPFFDHHNHHQFGTNTSTTTIDHHHHHHQHQSSYTGNSSGLVSQYSVKPCFIGASYAVAADQTASNFGGGFAAAADFSEGSASRVSSFFMGSEVKETNSSNSSNVSNYAGYQMSGNDNNGTTAFSWENDNKLESFFQQFQANMINGNIVKSEEIIRTSSSSSWQALQSSVDFSSYNPLT…
BnGMYB67	Maker09720	chr9	17808903	17809960	-	244	27540.8	10.01	nucleus	-0.814	MGKSSSSSSNNTSNSDVIIGRKNCYRGHWRPAEDDKLRDLVQRYGPQNWNFIAEHLHGRSGKSCRLRWYNQLDPNINKKPFSEEEEERLLSVHRVYGNKWACIAKYFHGRTDNAVKNHYHVVMARRKRERRFSAATTSPTLNNNSSNNNNNKKIAPISTTIRGRGVSLIHHGQFGRLYGGTTSSTISSGSECYKVSEEMSNKRNHESLVLMNSSSTSSSAALLNKFSLKQVPFIDFLGVGITSN
